# Supplementary material for: Biodegradation of the neonicotinoid insecticide acetamiprid in surface water by the bacterium Variovorax boronicumulans CGMCC 4969 and its enzymatic mechanism
Source: Royal Society of Chemistry journal article supplement (doi:10.1039/c7ra01501a), 2017-01-01
Supplement: c7ra01501a1.pdf [file c7ra01501a1.pdf]

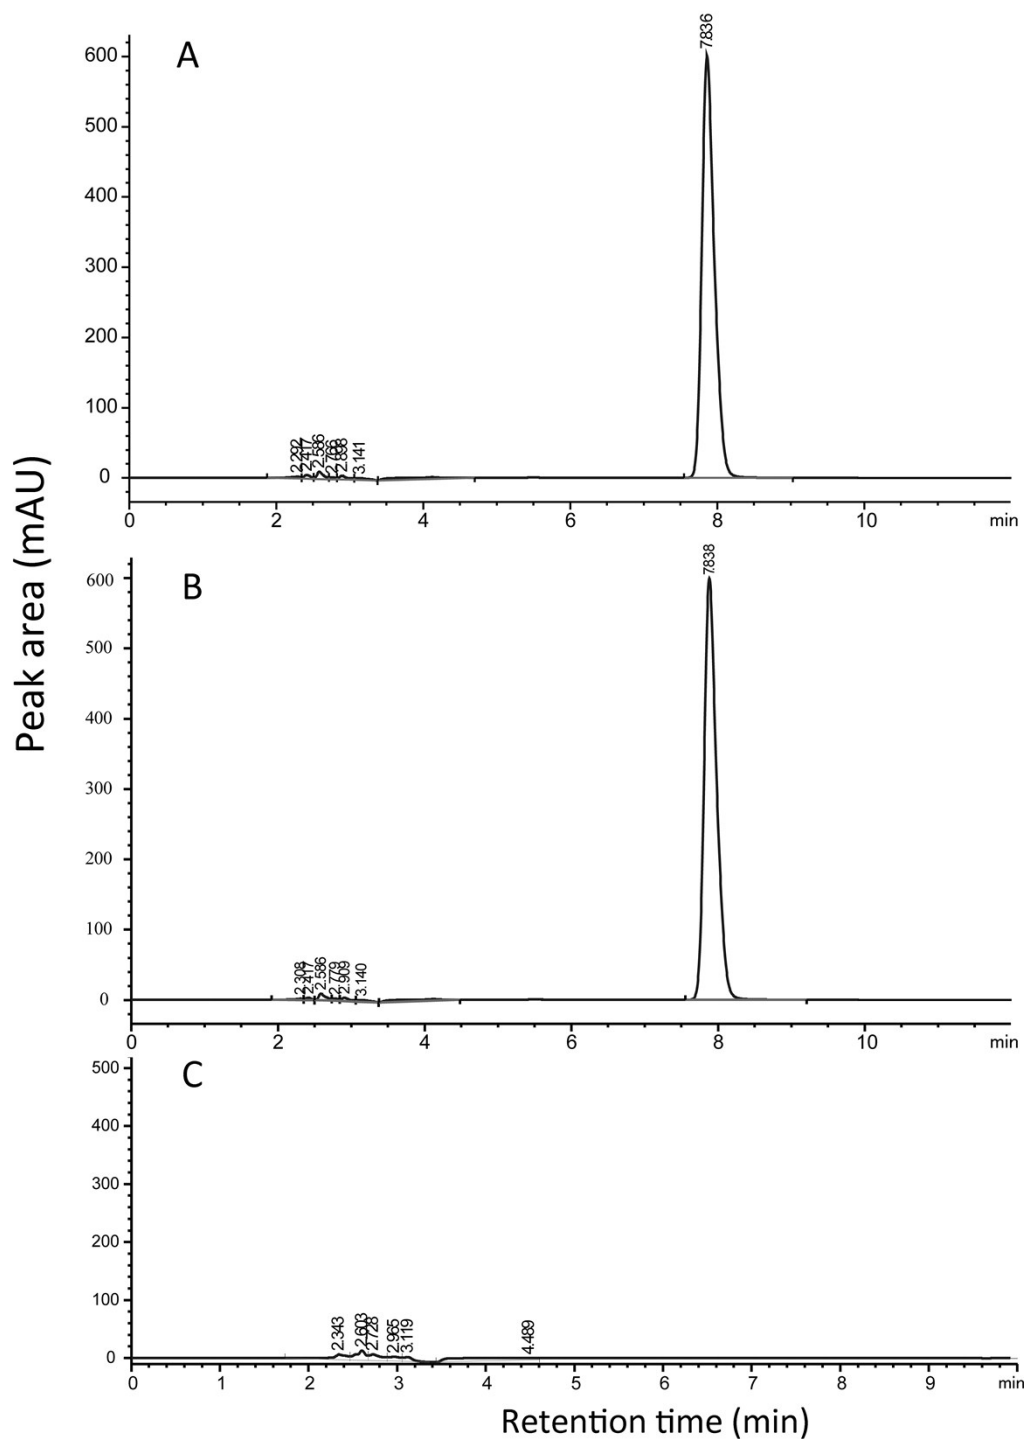

**Figure S1** HPLC analysis of AAP biodegradation by resting cells of *E. coli*-pET28a.

A, transformation broth with inoculation of the bacterium and addition of AAP; B, transformation broth with AAP alone; C, transformation broth with inoculation of the bacterium alone.
